# Supplementary material for: Inhibition of TRPC6 by protein kinase C isoforms in cultured human podocytes
Source: PubMed Central journal article supplement (PMC4687697; doi:10.1111/jcmm.12660), 2015-09-25
Supplement: JCMM-19-2771-s001.pdf [file JCMM-19-2771-s001.pdf]

# **Supplementary Information (Ambrus et al., Inhibition of TRPC6 by protein kinase C isoforms in cultured human podocytes)**

## **1. Supplementary Materials and Methods**

### *Culturing of Human embryonic kidney (HEK293) cells*

Human embryonic kidney (HEK293) cells were cultured in DMEM medium (PAA Laboratories GmbH, Pasching, Austria) supplemented with 10% fetal bovine serum, (Invitrogen, Paisley, UK), 50 U/ml penicillin, 50 µg/ml streptomycin, 1.25 µg/ml Fungizone (both from PPA Laboratories GmbH) and 2mM L-glutamine (Life Technologies Corporation, Carlsbad, CA, USA) under 5% CO<sub>2</sub> at 37°C.

### *Plasmid DNA Transfection*

The transfection was performed using Lipofectamine<sup>TM</sup> 2000 (Life Technologies Corporation) according to the manufacturer's instructions. HEK293 cells were plated on 35-mm dishes. At cca. 80% confluence, 12 µg plasmid DNA and Lipofectamin transfection reagent was added to the cells for 3.5 hours. After that the medium was changed to the selection medium (basic culture medium supplemented with 750 µg/ml geneticin [Life Technologies Corporation]).

### *Vector*

The TRPC6 overexpressing vector (EX-U0193-M09) was a kind gift from Noémi Kedei (National Institutes for Health, Bethesda, MD, United States).

### *Quantitative real-time PCR (Q-PCR)*

Quantitative real-time PCR was performed on an ABI Prism 7000 sequence detection system (Applied Biosystems, Foster City, CA) by using the 50 nuclease assay. Total RNA was isolated with TRIzol (Invitrogen, Paisley, UK) as described by Tóth *et al.* 2011 [30], and the isolated total RNA was reverse-transcribed into cDNA. For the amplification of the cDNA we used the TaqMan primers and probes (PKC $\alpha$ : assay ID Hs00176973\_m1; PKC $\beta$ : assay ID Hs00176998\_m1; PKC $\gamma$ : assay ID Hs00177010\_m1; PKC $\delta$ : assay ID Hs00178914\_m1; PKC $\eta$ : assay ID Hs00178933\_m1; PKC $\epsilon$ : assay ID Hs00178455\_m1; PKC $\zeta$ : assay ID Hs00177051\_m1; PKC $\theta$ : assay ID Hs00234704\_m1; PKC $\lambda$ / $\iota$ : assay ID Hs00995854\_m1) using the TaqMan universal PCR mastermix protocol (Applied Biosystem). As internal control, transcripts of glyceraldehyde 3-phosphate dehydrogenase (assay ID Hs99999905\_m1) were determined.

## 2. Supplementary Figures

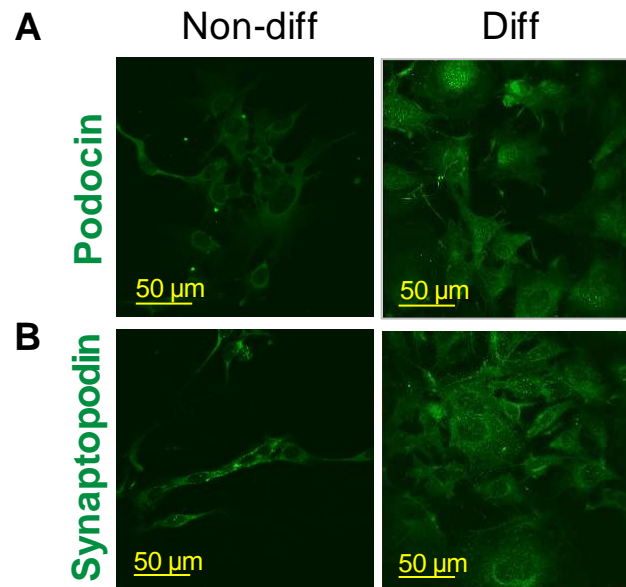

**Supplementary Figure S1:** *Comparison of podocin and synaptopodin expression of non-differentiated and differentiated podocytes*

Immunoreactivities of podocin (A) and synaptopodin (B) were determined on non-differentiated (Non-diff) and differentiated (Diff) human podocytes by immunofluorescence labeling (Alexa-Fluor<sup>®</sup>-488, green fluorescence). Calibration marks: 50 μm. (*Note that images of differentiated podocytes are also shown on **Figure 1B** and **C!***)

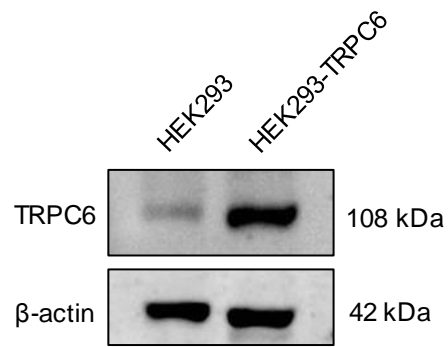

**Supplementary Figure S2:** *TRPC6* protein expression on *TRPC6* overexpressing human embryonic kidney (HEK293) cells

To assess the specificity of the TRPC6 antibody Western blot analysis of TRPC6 protein was performed in naïve as well as TRPC6-transfected HEK293 cells (HEK293-TRPC6). To assess equal loading, the expression of  $\beta$ -actin was determined.

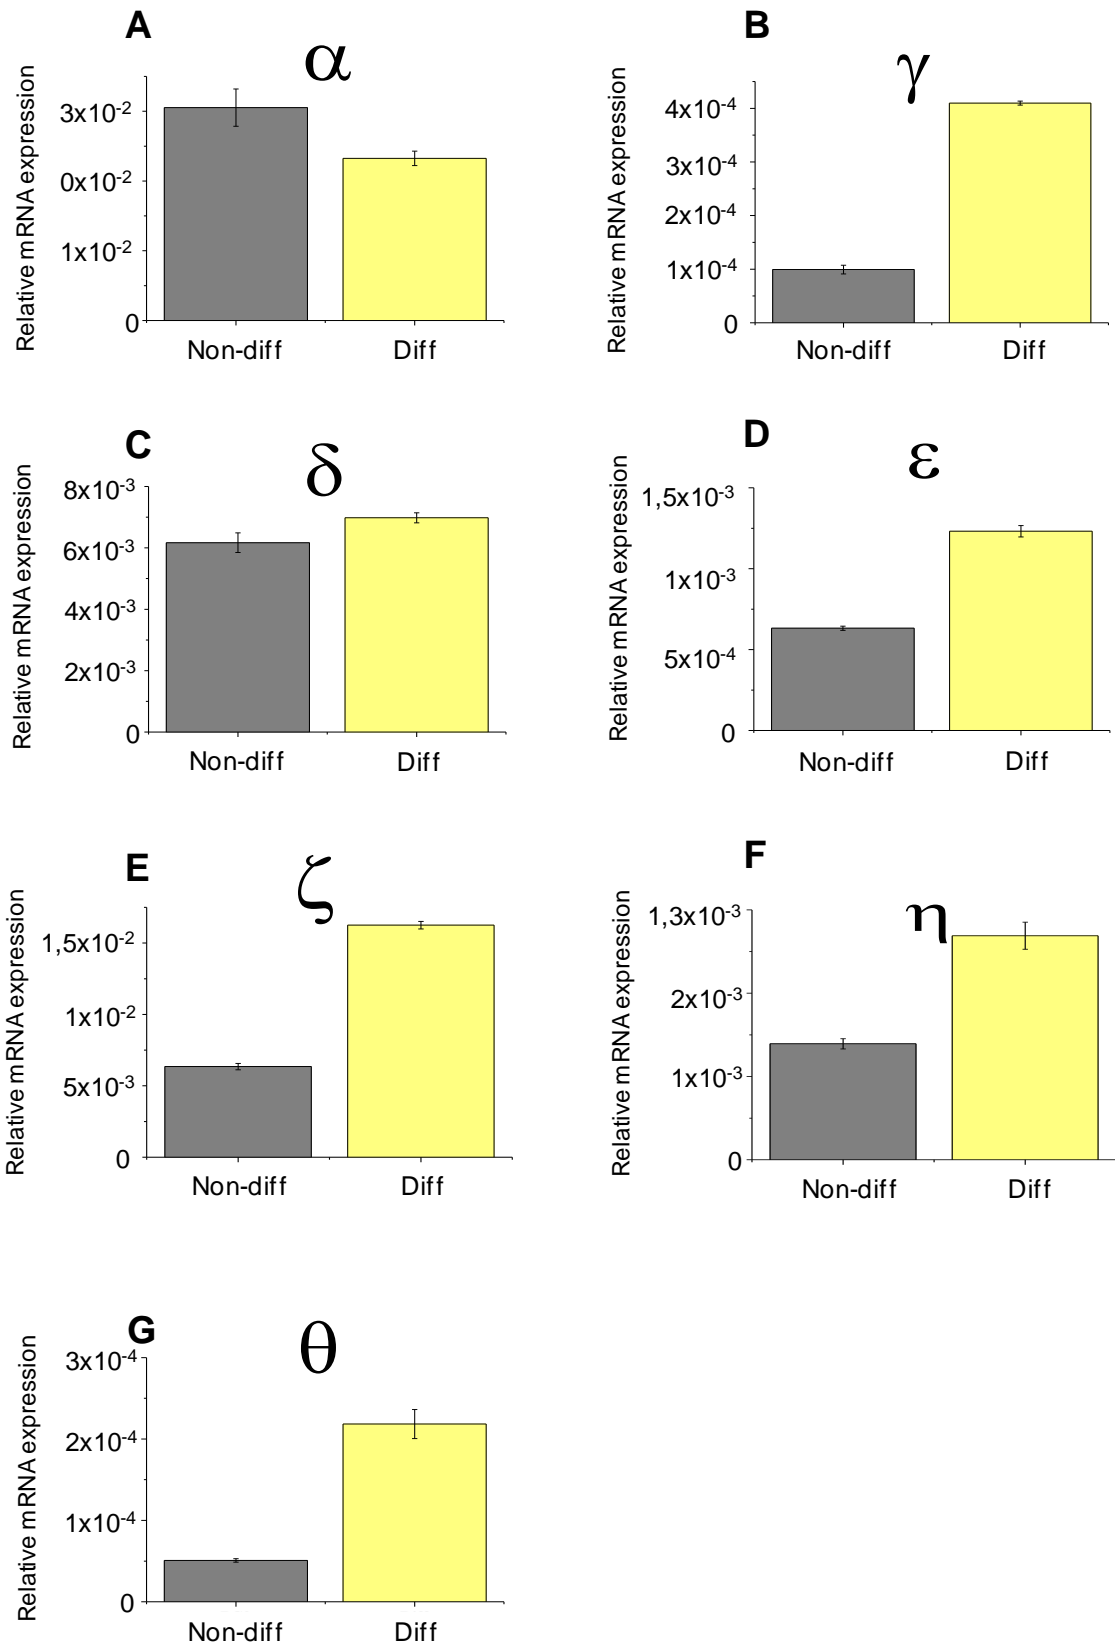

**Supplementary Figure S3: Multiple PKC isoforms are expressed in human podocytes**

The mRNA expression of different PKC isoforms was determined by quantitative real-time PCR on non-differentiated (Non-diff) and differentiated (Diff) human podocytes. PKC $\alpha$  (**A**), - $\gamma$  (**B**), - $\delta$  (**C**), - $\epsilon$  (**D**), - $\zeta$  (**E**), - $\eta$  (**F**), - $\theta$  (**G**) were expressed on podocytes. Expressions of PKC $\beta$  and  $\lambda$  were around the detection limit. As an internal control the expression of glyceraldehyde 3-phosphate dehydrogenase was used.
